# Supplementary figures and images for: Genome-Wide Analysis of the AP2/ERF Family in Oily Persimmon (Diospyros oleifera) and Their Preliminary Roles Exploration in Response to Polyamines for Adventitious Root Formation in Cultivated Persimmon (D. kaki)
Source: MDPI journal article supplement (doi:10.3390/horticulturae9020191), 2023-02-02

DoIERF

Soloist  
RAV

DoIAP2

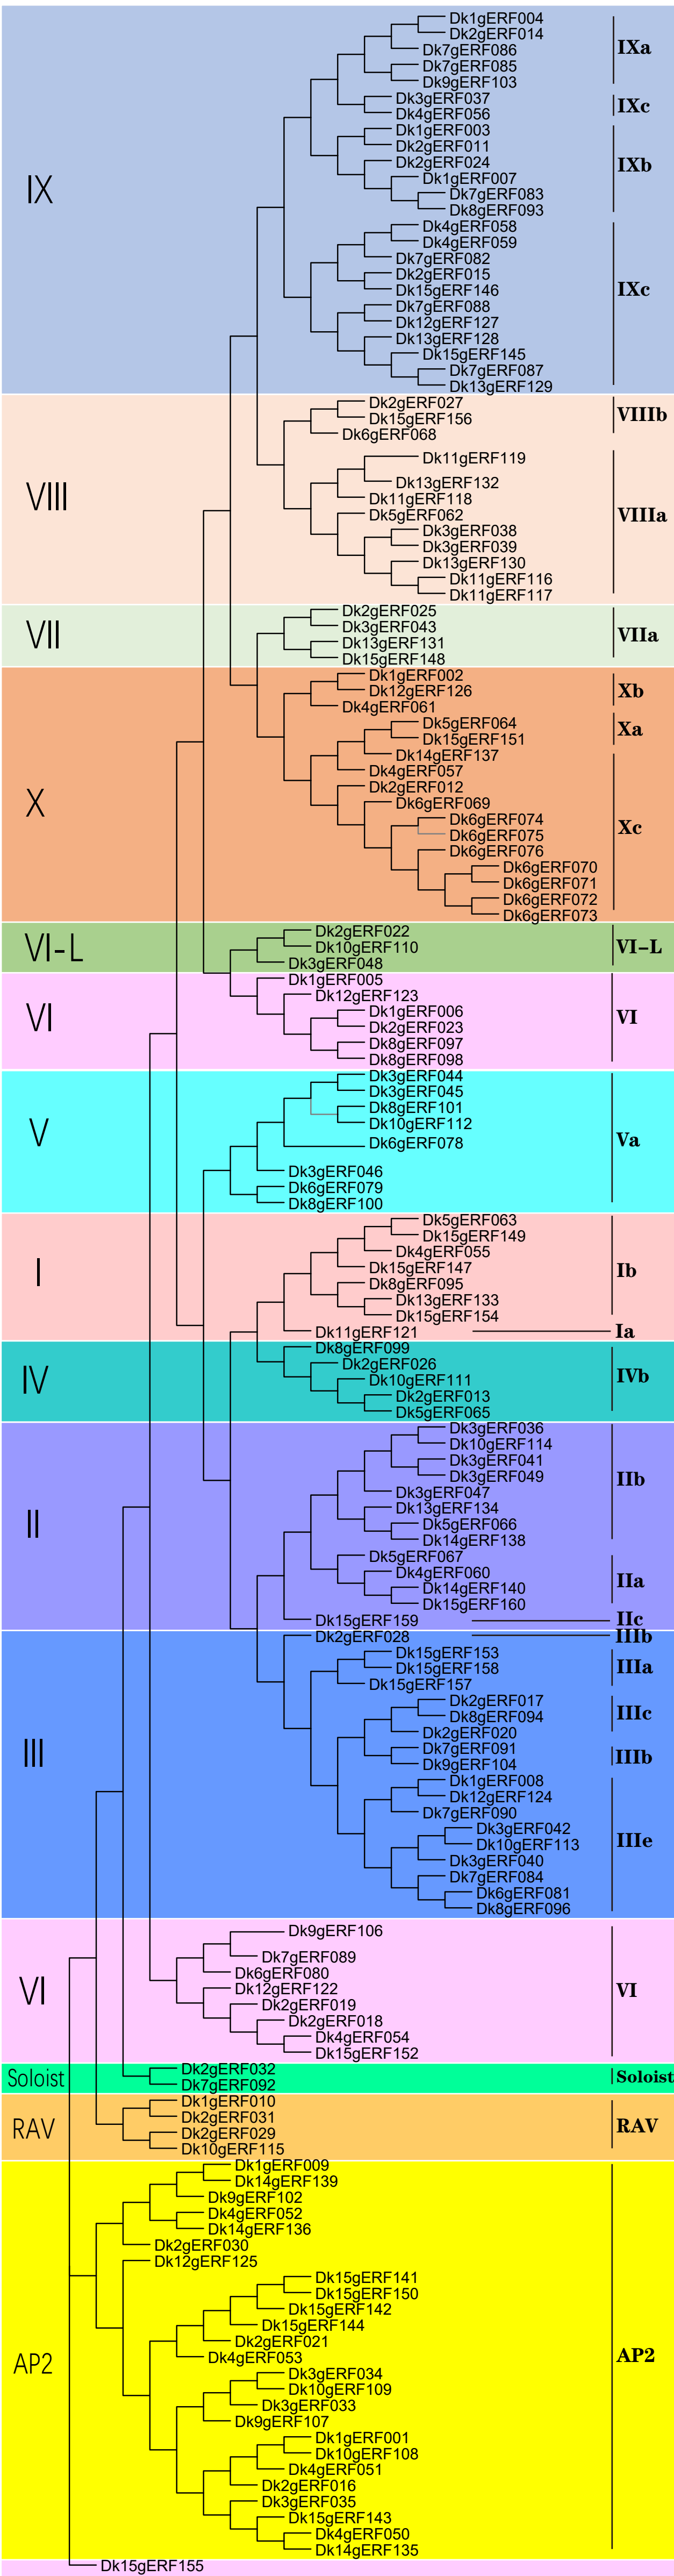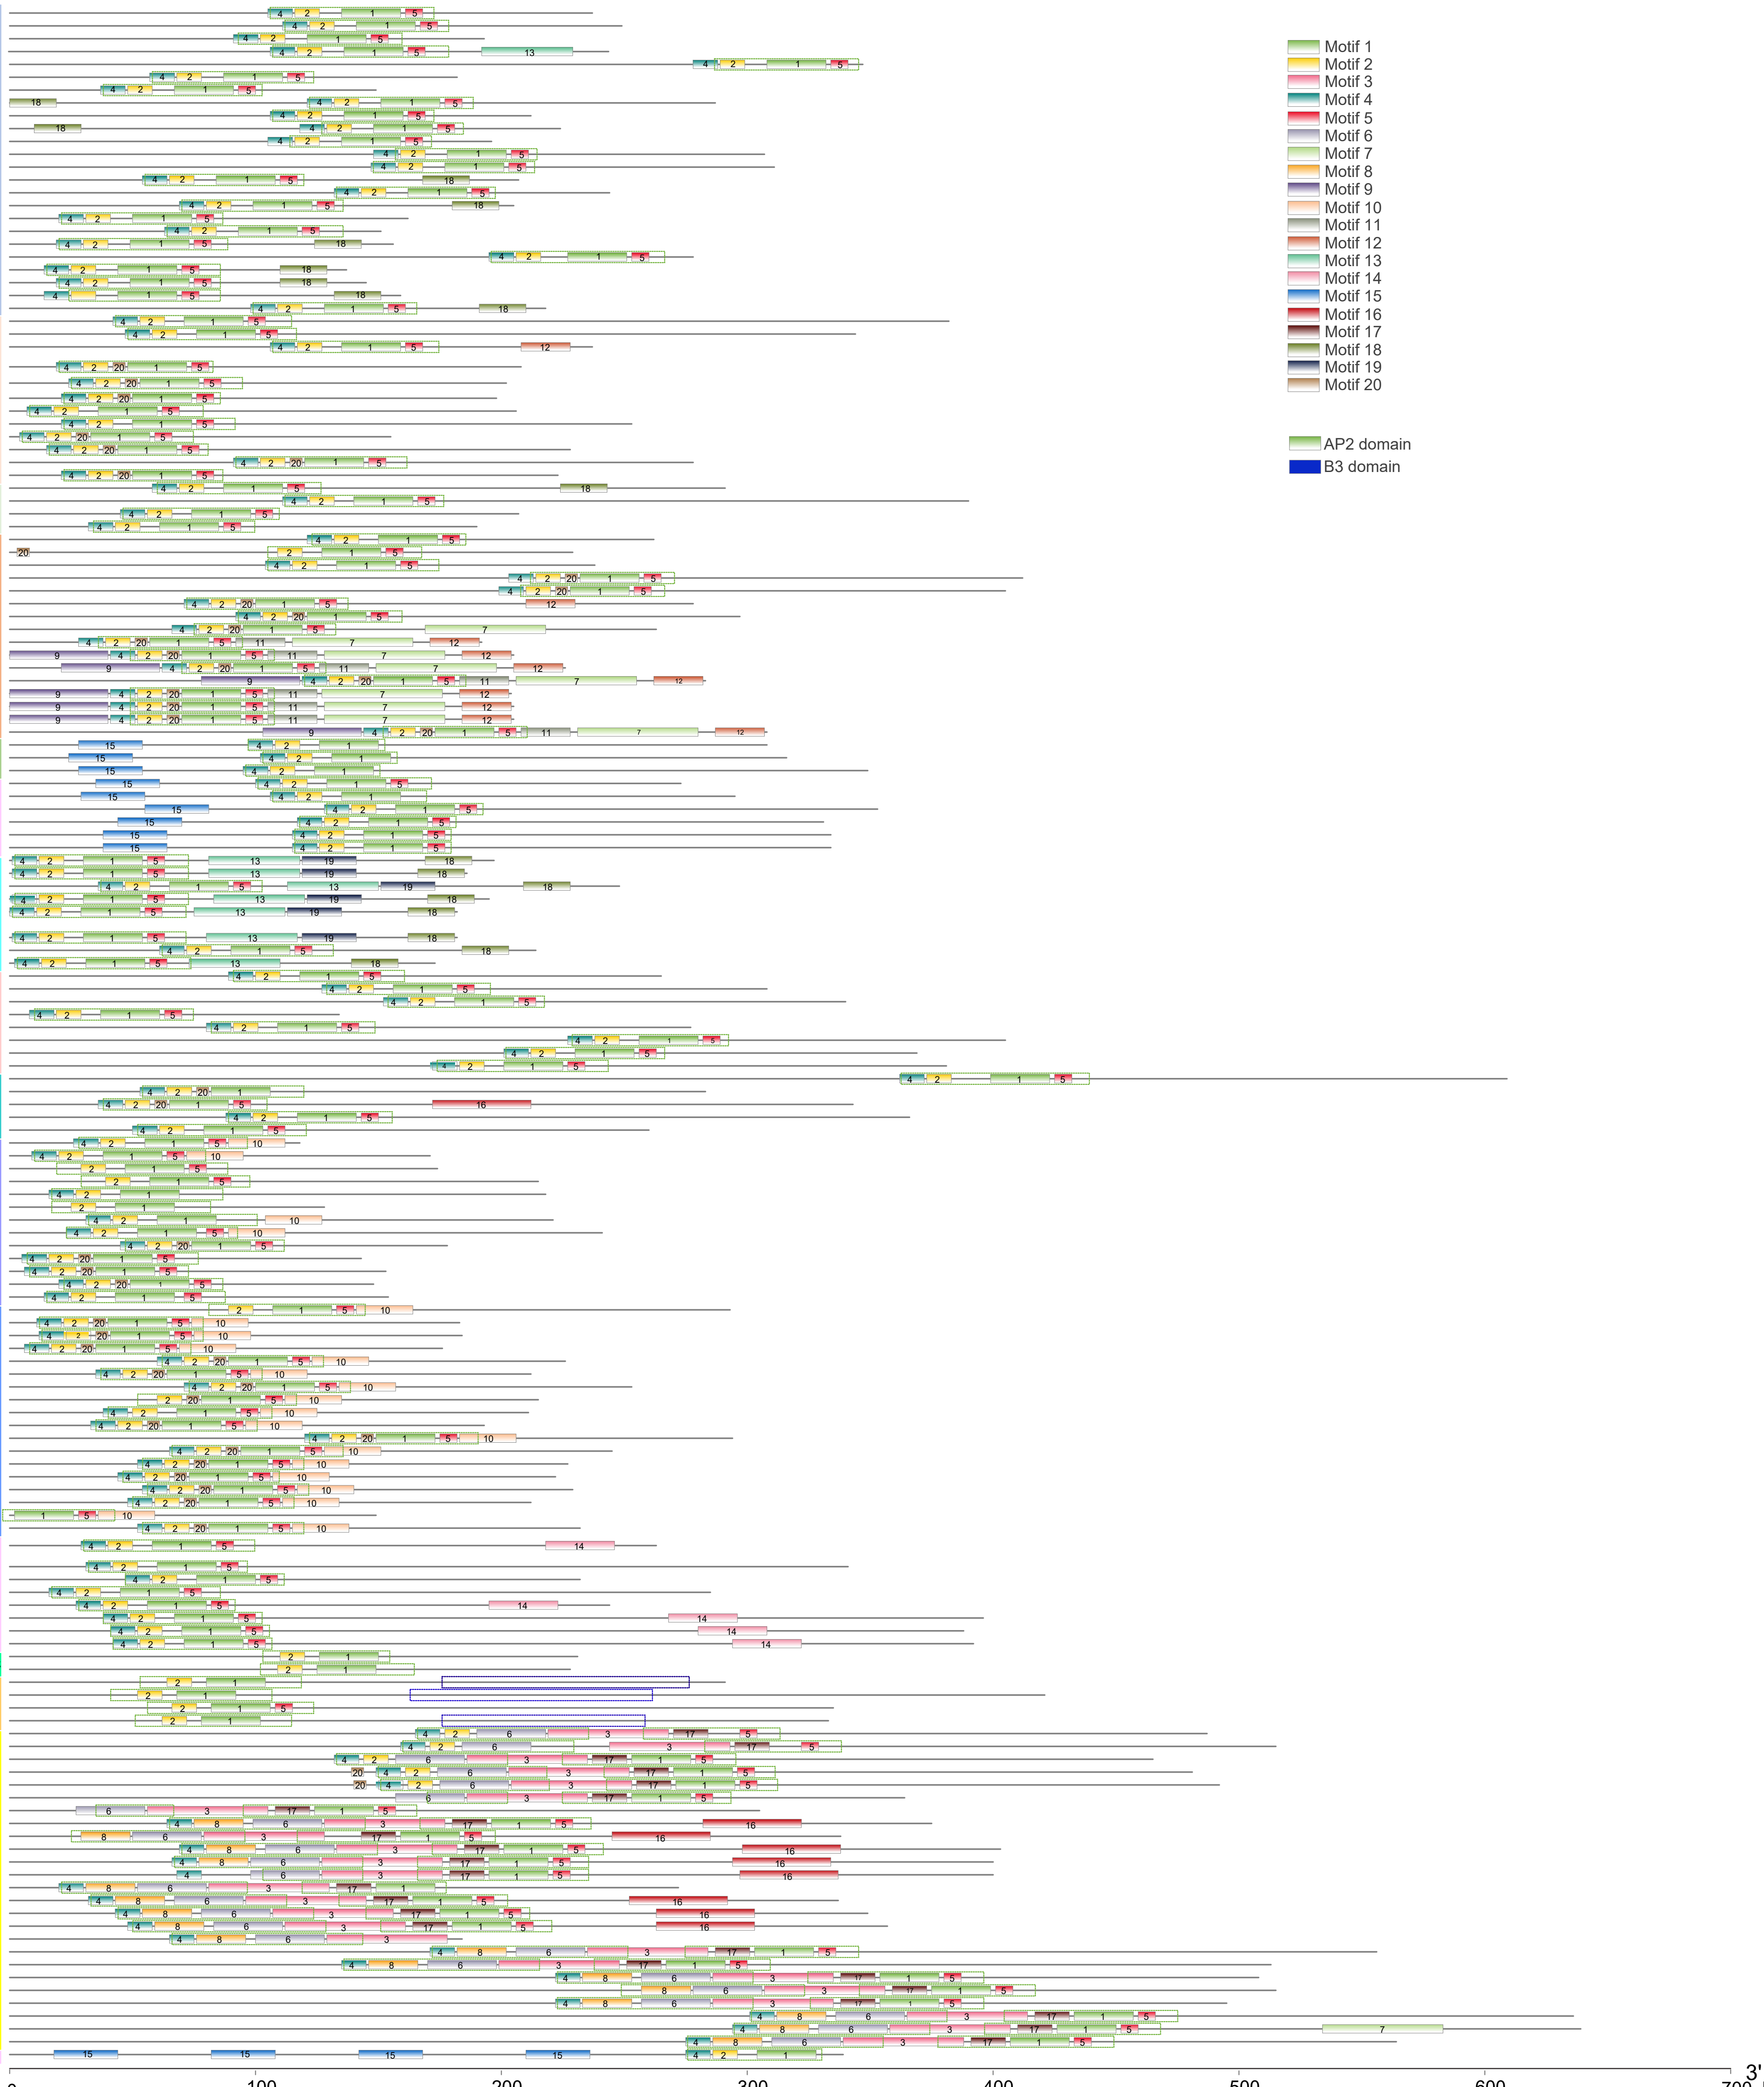

Supplement: s1 [file s1]

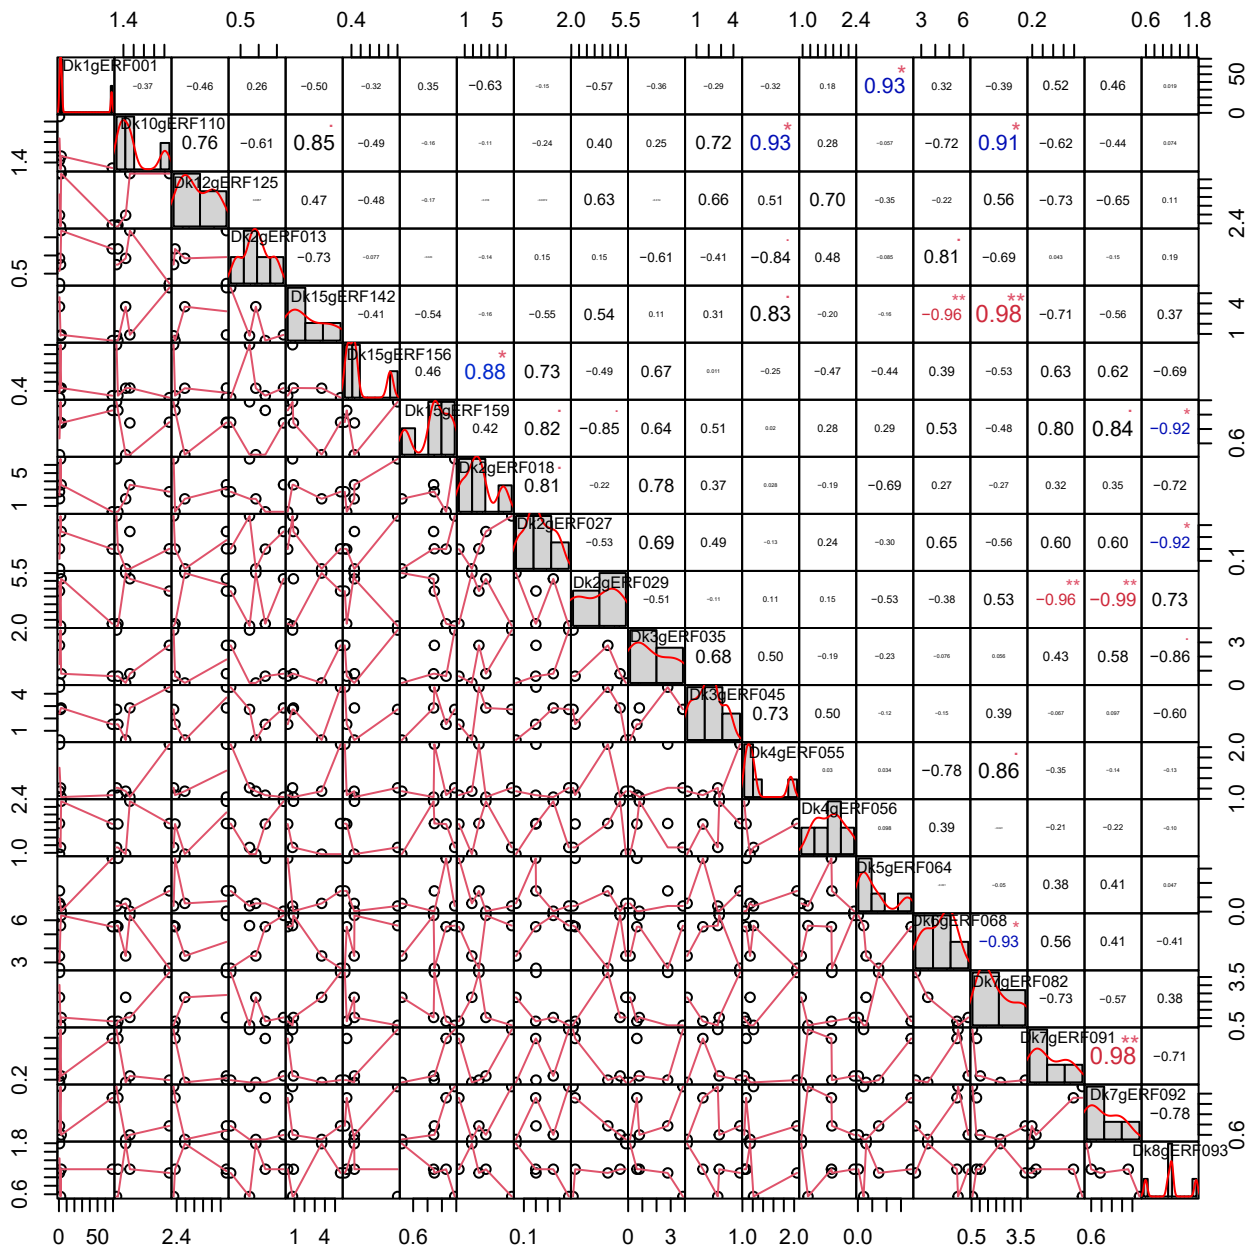

Supplement: s1 [file s1]

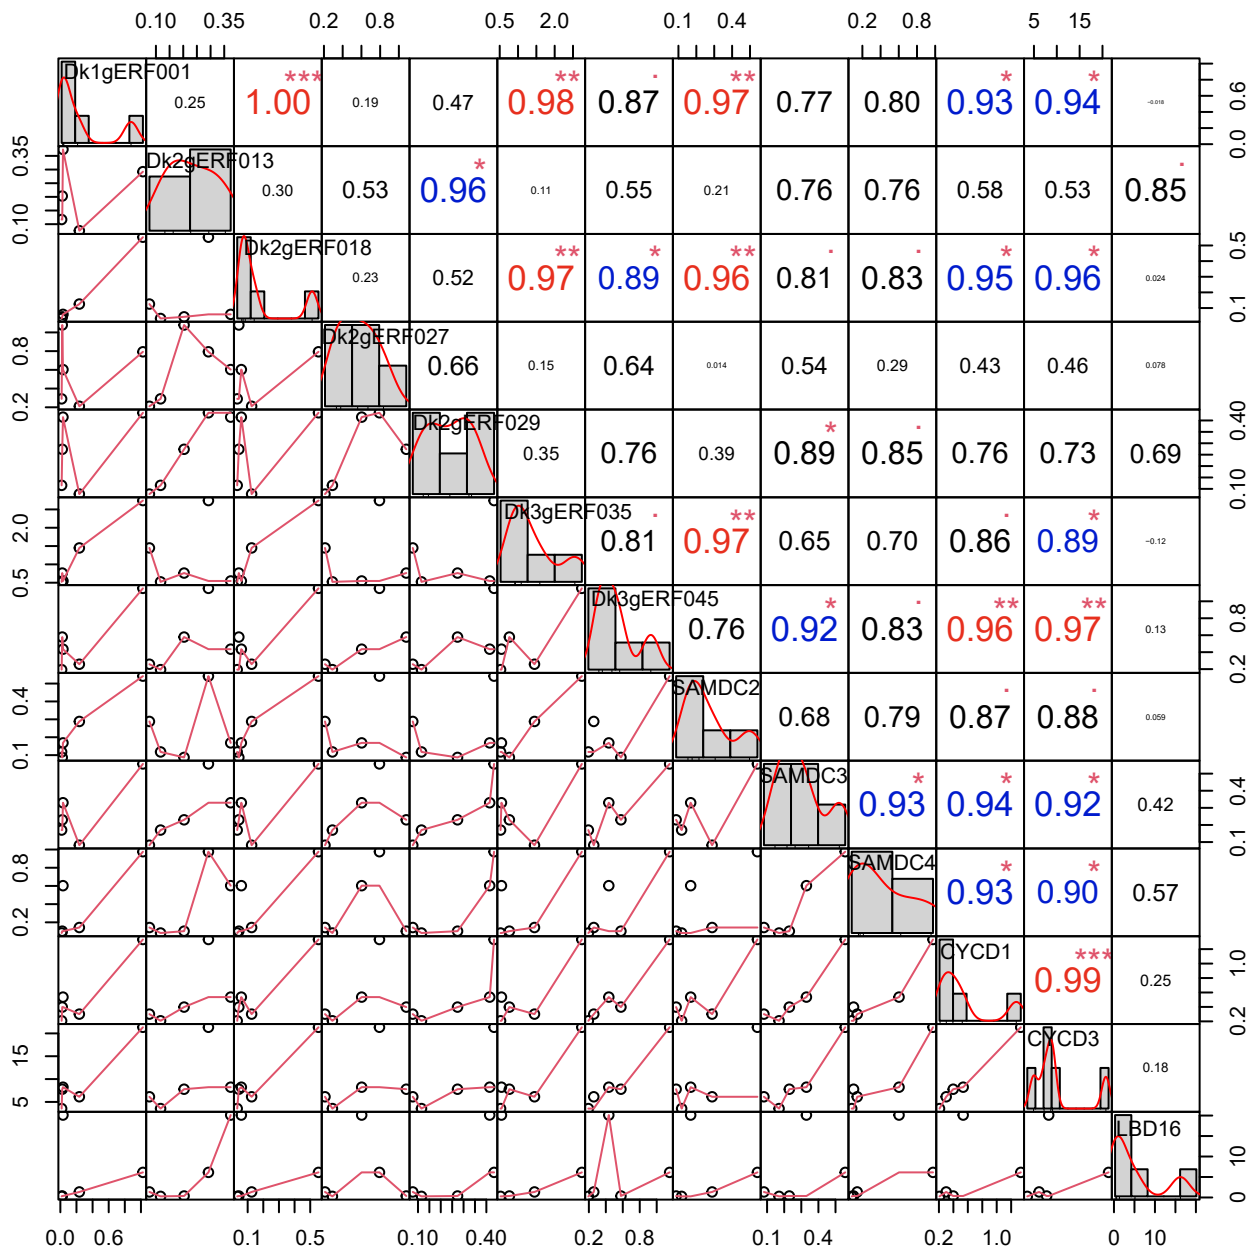

Supplement: s1 [file s1]
